# Supplementary material for: Influence of Wheat Straw Return on Yield and Grain Quality in Different Direct-Seeding Rice Production Systems
Source: MDPI journal article supplement (doi:10.3390/agronomy12123180), 2022-12-15
Supplement: s1 [file s1]

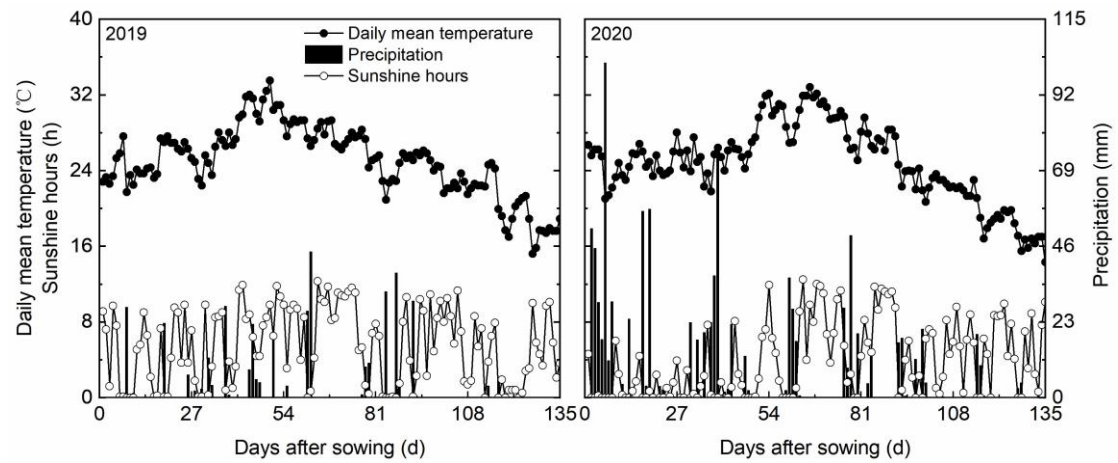

Figure S1: daily mean temperature, sunshine hours, and precipitation during the rice growth season in 2019 and 2020. The 0 days after sowing is June 11 for both years
