# Supplementary material for: Influence of Wheat Straw Return on Yield and Grain Quality in Different Direct-Seeding Rice Production Systems
Source: MDPI journal article supplement (doi:10.3390/agronomy12123180), 2022-12-15
Supplement: s1 [file s1]

Archive with 1 entries (1 files):
- agronomy-2079984-supplementary.pdf
